# Supplementary material for: Self-constructed side-by-side nanofiber photocatalyst via oppositely charged electrospinning and its photocatalytic degradation of rhodamine B
Source: Royal Society of Chemistry journal article supplement (doi:10.1039/c9nj03305j), 2019-01-01
Supplement: c9nj03305j1.pdf [file c9nj03305j1.pdf]

*Supporting Information*

**Self-constructed Side-by-Side Nanofiber Photocatalyst via Opposite Charged Electrospinning and its Photocatalytic Degradation of Rhodamine B**

Guoqing Chang<sup>\*†a, b, c</sup>, Wajid Ullah<sup>†a</sup>, Aike Li<sup>d</sup>, Sandeep K Das<sup>a</sup>, Liwei Lin<sup>c</sup>, Xu Wang<sup>e</sup>

<sup>a</sup>MOE Key Laboratory of Macromolecular Synthesis and Functionalization, State Key Laboratory of Silicon Materials, Department of Polymer Science and Engineering, Zhejiang University, Hangzhou 310027, Zhejiang, China

<sup>b</sup>College of Material Science and Engineering, Hebei University of Engineering, Handan 056000, Hebei, China

<sup>c</sup>Department of Mechanical Engineering and Berkeley Sensor and Actuator Center, University of California, Berkeley 94720, California, USA

<sup>d</sup>School of Bioscience and Bioengineering, Hebei University of Economics and Business, Shijiazhuang 050061, Hebei, China

<sup>e</sup>School of Aerospace, Mechanical and Manufacturing Engineering, RMIT University, Bundoora East, Vic 3083, Australia

---

<sup>\*\*</sup> Corresponding at: Department of Polymer Science and Engineering, Zhejiang University, Hangzhou 310027, Zhejiang, China

E-mail: [gqchang127@126.com](mailto:gqchang127@126.com)

<sup>†</sup>These authors contributed equally to this work.

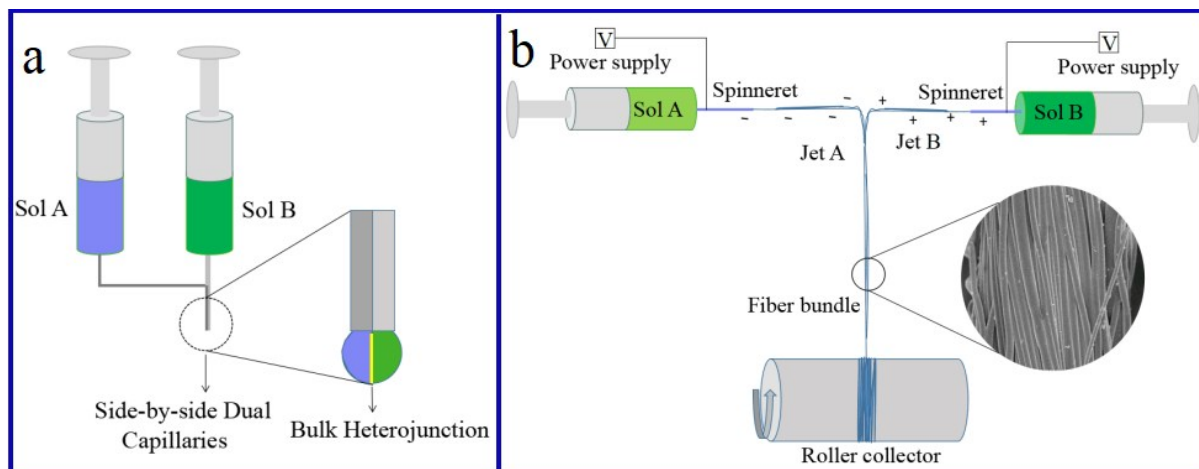

**Fig. S1.** The schematic diagram illustrating the bulk heterojunction was formed by the side-by-side dual capillaries with two distinct polymer precursors (a) and side-by-side bundles were formed by experimental setup without using the metal sheet at the tip of the spinneret (b).

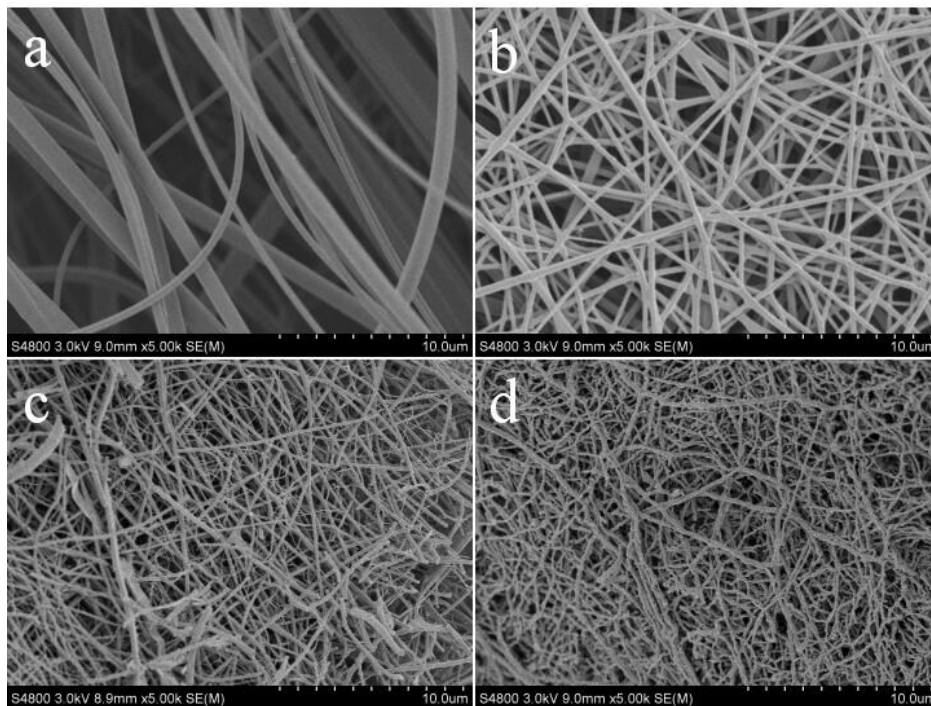

**Fig. S2.** (a,b) Morphology of electrospun single PVP/Co acetate and PVP/TBT fibres; (c, d) Morphology of electrospun single  $\text{TiO}_2$  and  $\text{Co}_3\text{O}_4$  fibres by SEM.

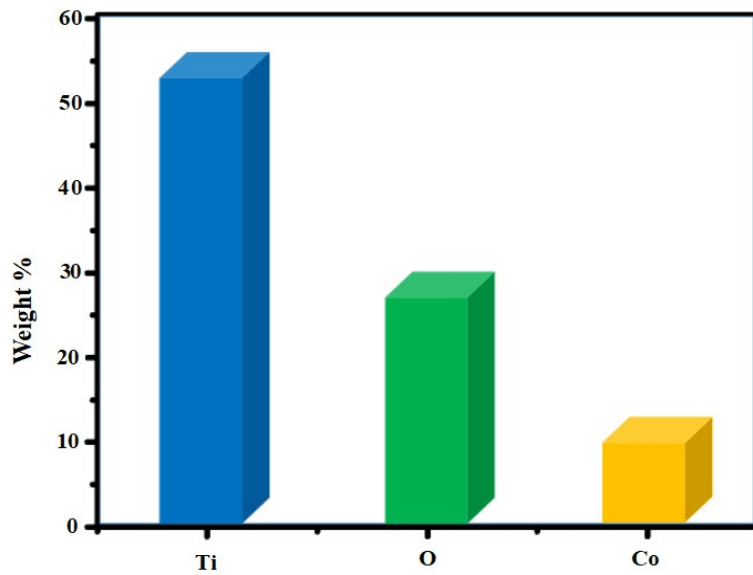

**Fig. S3.** EDS spectrum and the compositional analysis of TiO<sub>2</sub>-CoO heterostructure.

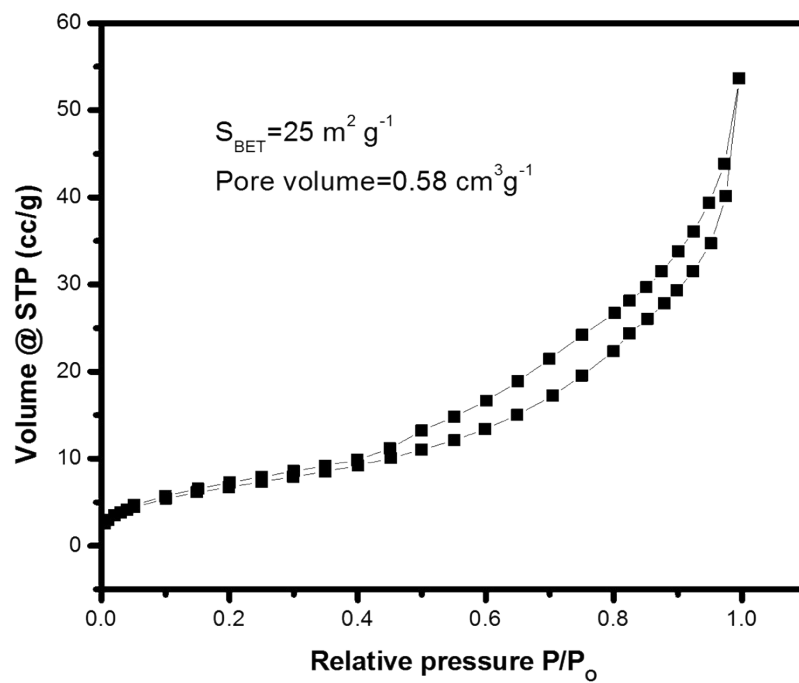

**Fig. S4.** Nitrogen adsorption-desorption isotherms of the prepared photocatalysts  $\text{TiO}_2\text{-CoO}$ . Component fibres were made scores of particles around a few tens of nanometers in diameter.

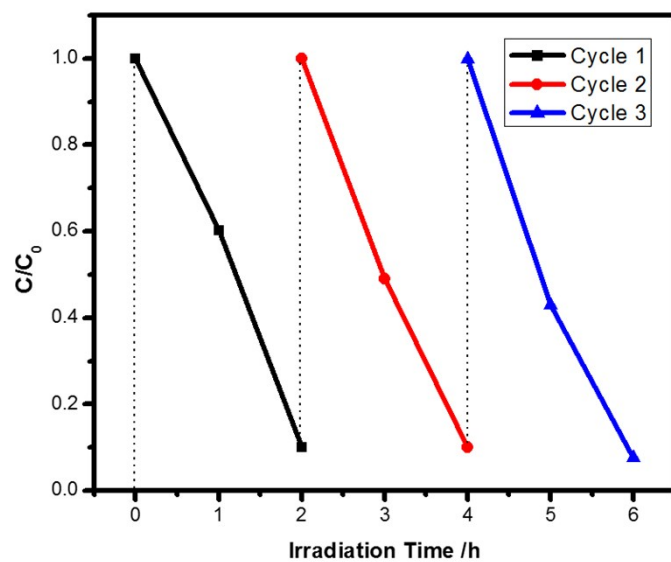

**Fig. S5.** Relative dye concentration versus light exposure time for three consecutive cycles of operation for  $\text{TiO}_2\text{-CoO}$  SBS fibres.

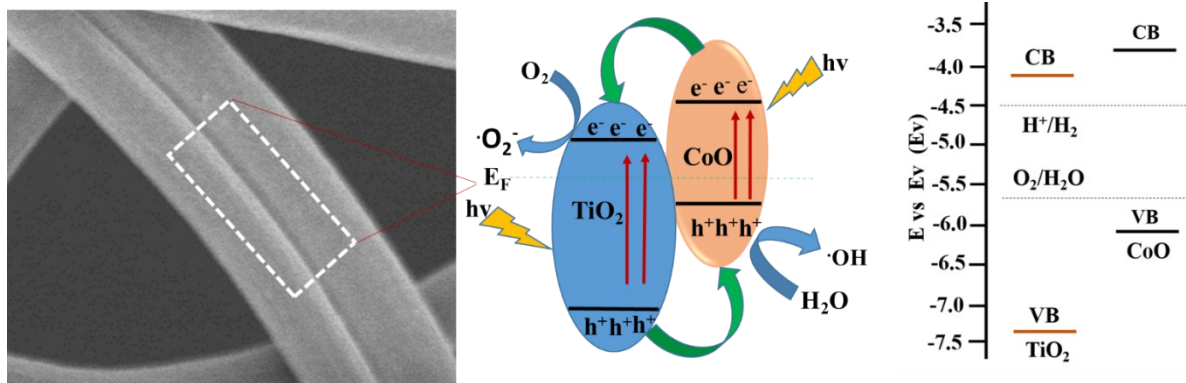

**Fig. S6.** Charge separation process of TiO<sub>2</sub>-CoO side by side fibres under the light irradiation.

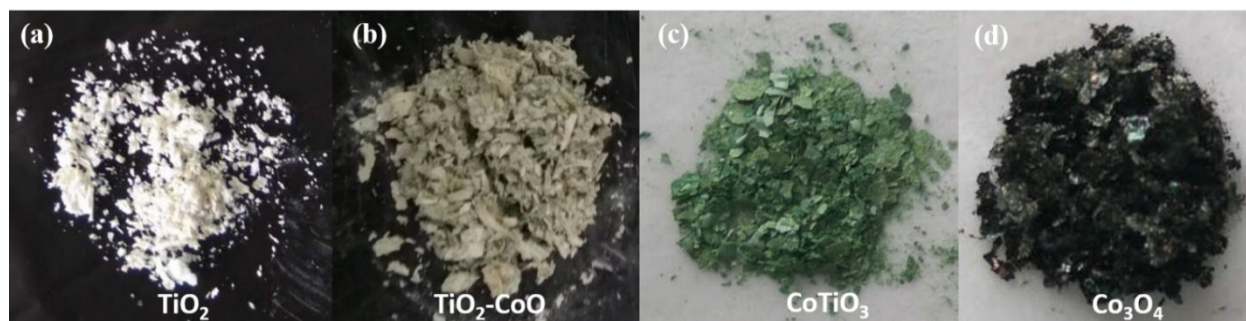

**Fig. S7.** Images of single  $\text{TiO}_2$  fibres,  $\text{TiO}_2\text{-CoO}$  SbS fibres,  $\text{CoTiO}_3$  single fibres and  $\text{Co}_3\text{O}_4$  single fibres.



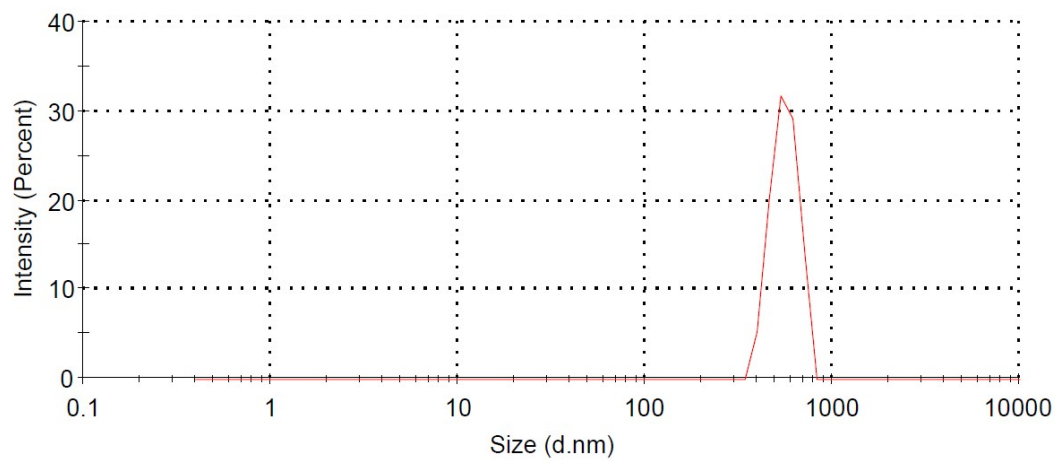

**Fig. S8.** The average thickness and thickness distribution of SBS electrospun nanofibres by DLS (Dynamic light scattering).

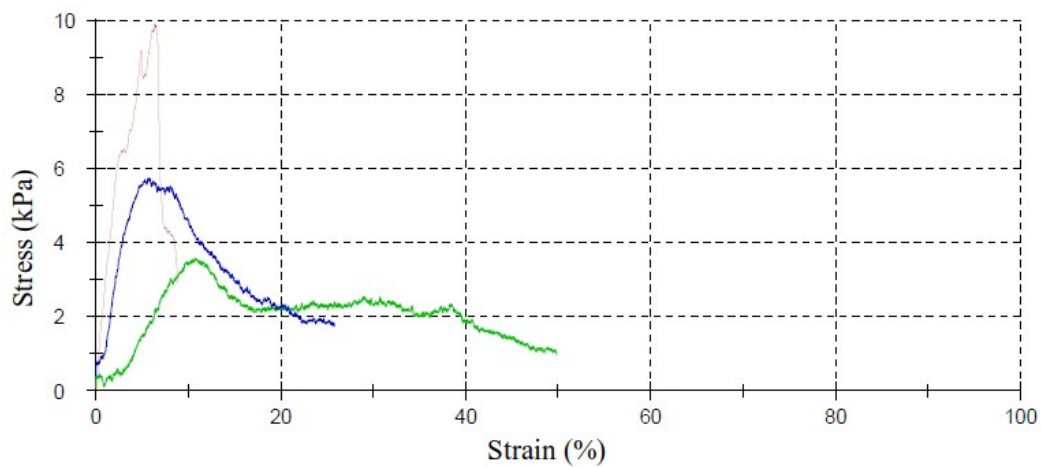

**Fig. S9.** Tensile properties of the electrospun SBS nanofibres mat with different thickness.
